# Supplementary material
Source: publisher figshare collection journal article supplement (https://acs.figshare.com/ndownloader/files/20136098)
Supplement: Supplementary file 1 [file 20136098]

**Supporting information for:**

**Nitrogen-enriched porous carbon fiber as a CO<sub>2</sub> adsorbent with superior CO<sub>2</sub>  
selectivity by air activation**

Long Xiong,<sup>ab</sup> Xue-Fei Wang,<sup>\*b</sup> Li Li,<sup>b</sup> Lu Jin,<sup>b</sup> Yong-Gang Zhang,<sup>b</sup> Shu-Lin Song,<sup>b</sup>

Rong-Pei Liu<sup>a</sup>

<sup>a</sup> Faculty of Material Science and Engineering, Kunming University of Science and Technology, Kunming 650093, China

<sup>b</sup> Ningbo Institute of Industrial Technology, Chinese Academy of Sciences, Ningbo 315201, China

Correspondence to: FAX: +86 574 87911382. E-mail address: wangxf@nimte.ac.cn

(Xue-Fei Wang)

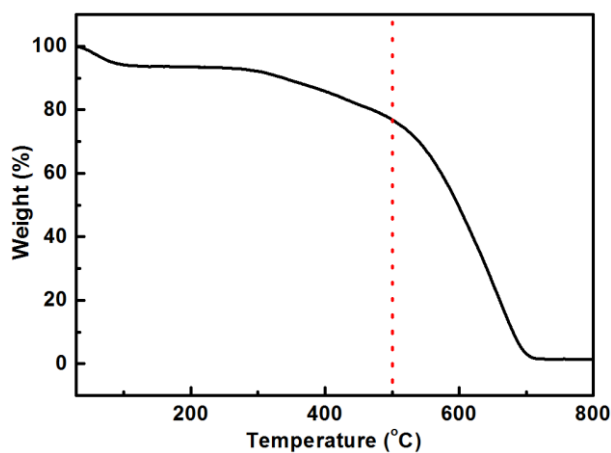

Figure S1. TG curve of oxidized polyacrylonitrile fiber under air atmosphere.

Table S1. Structure parameters of graphite-like crystallite of porous carbon fibers

| Sample  | 2 $\theta$ (°) | d <sub>002</sub> (nm) | FWHM (°) | L <sub>c</sub> (nm) | L <sub>c</sub> / d <sub>002</sub> |
|---------|----------------|-----------------------|----------|---------------------|-----------------------------------|
| PCF-400 | 25.763         | 0.3457                | 5.915    | 1.53                | 4-5                               |
| PCF-450 | 26.047         | 0.3420                | 6.559    | 1.38                | 4-5                               |
| PCF-500 | 26.177         | 0.3403                | 6.261    | 1.45                | 4-5                               |
| PCF-N   | 25.425         | 0.3502                | 4.943    | 1.83                | 5-6                               |

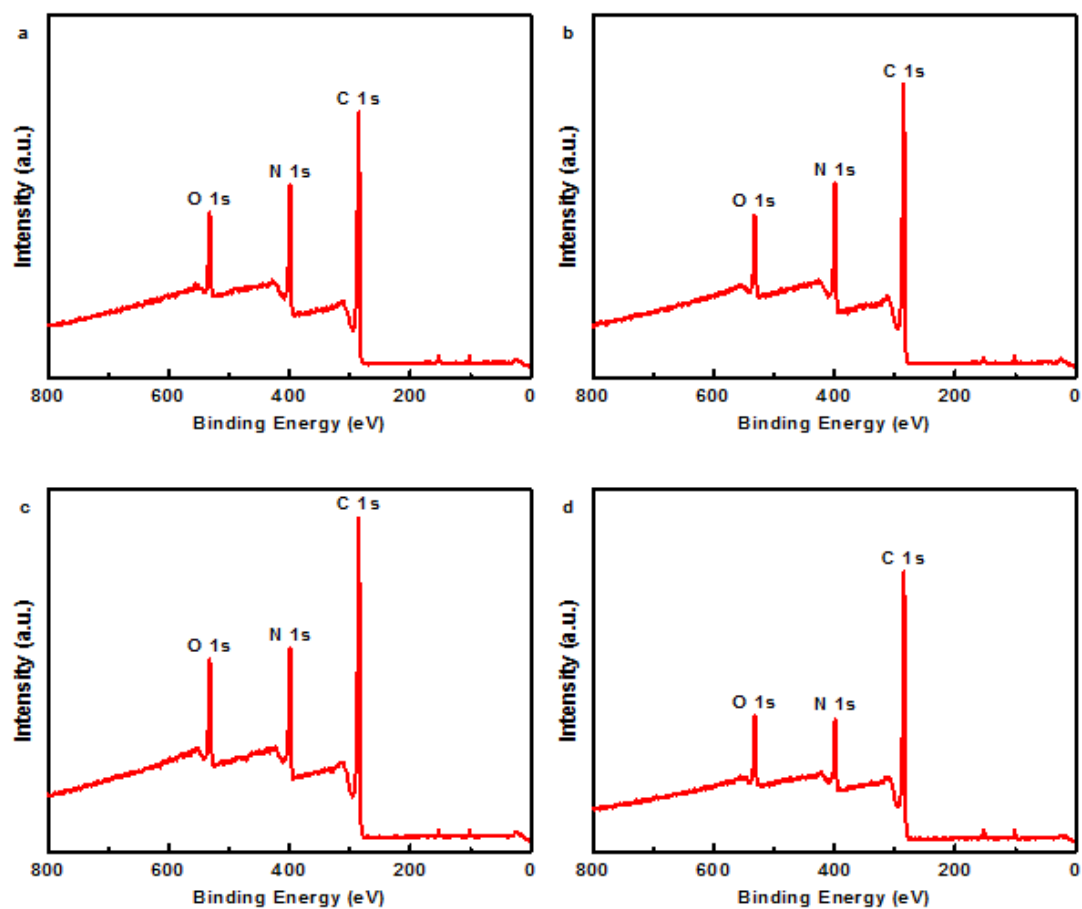

Figure S2. XPS spectra of (a) PCF-400, (b) PCF-450, (c) PCF-500, and (d) PCF-N.

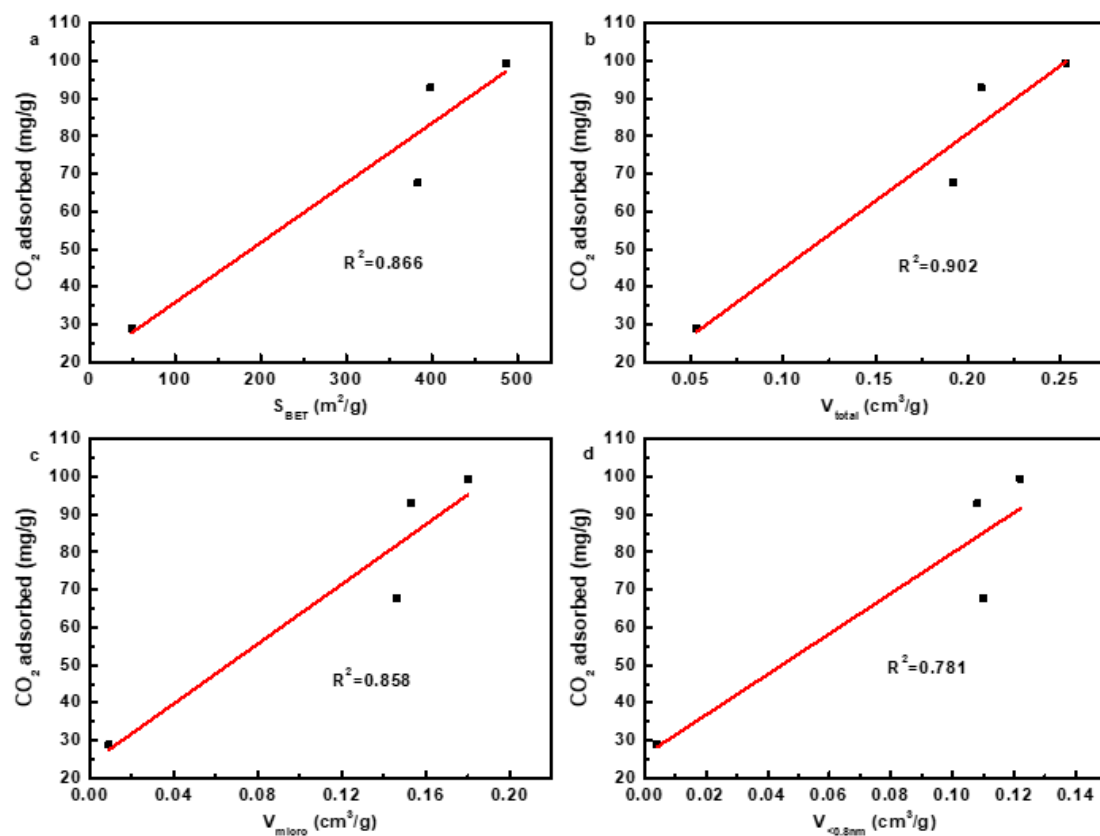

Figure S3. Correlation between adsorption capacity (1 bar, 25 °C) and (a) specific surface area, (b) total pore volume, (c) micropore volume, and (d) volume of pores with a size below 0.8 nm.

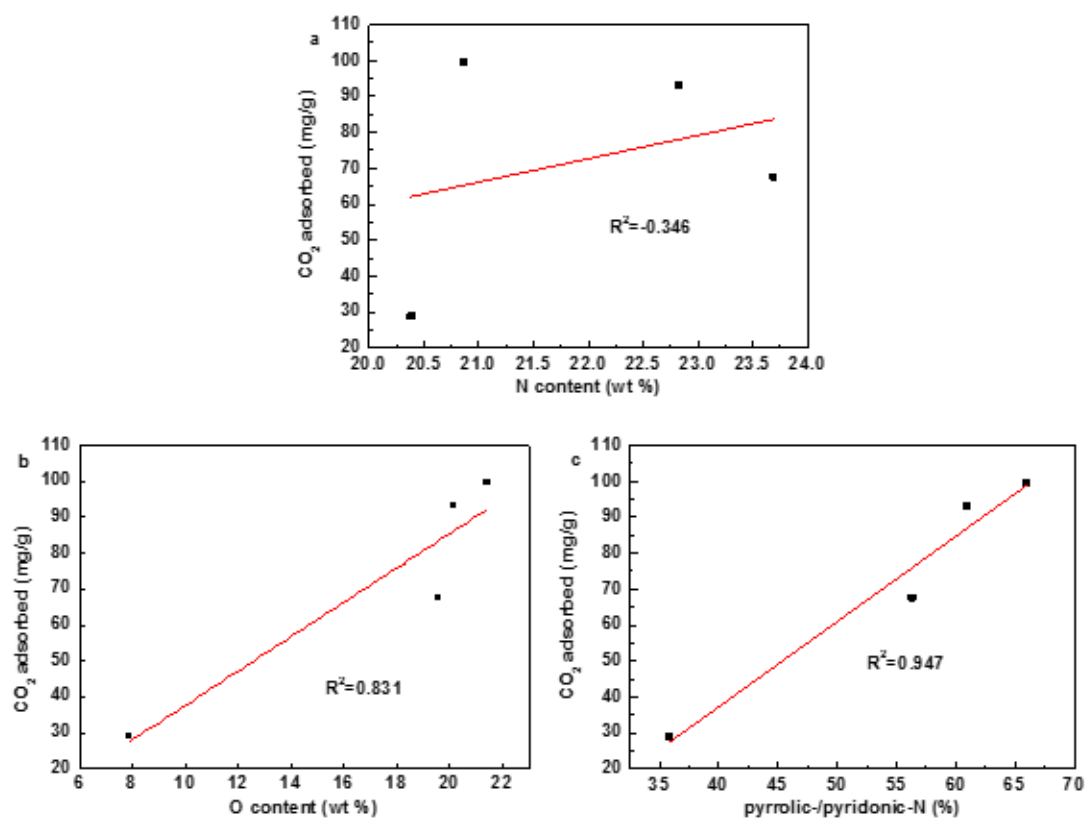

Figure S4. Correlation between adsorption capacity (1 bar, 25 °C) and (a) nitrogen content, (b) oxygen content, and (c) pyrrolic-/pyridonic-N content.

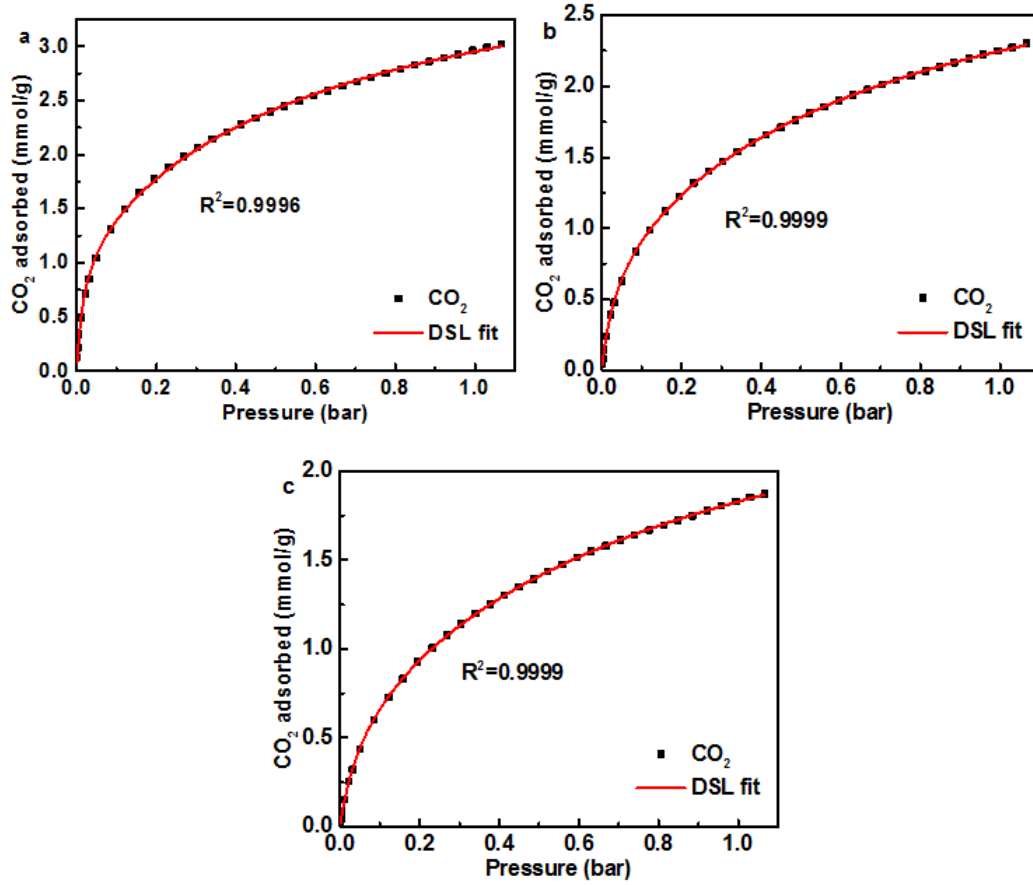

Figure S5. CO<sub>2</sub> adsorption isotherms of PCF-500 measured at (a) 0 °C, (b) 25 °C, and (c) 40 °C and curves fitted by the dual-site Langmuir model.

### Calculation of Henry's law selectivity

To calculate the Henry's law selectivity of CO<sub>2</sub> over N<sub>2</sub> at 0, 25, and 40 °C for PCF-500, the CO<sub>2</sub> and N<sub>2</sub> adsorption isotherms were fitted with a virial-type equation:

$$\ln(n/p) = A_0 + A_1n + A_2n^2 + \dots$$

where  $p$  (in Pa) is the pressure and  $n$  (in mol/g) is the gas adsorbed amount,  $A_i$  ( $i=1,2,3,\dots$ ) is virial coefficient which is required to sufficiently describe the isotherms.

$A_0$  is in relation to the interaction between adsorbent and adsorbate,  $A_1$  is in relation to the interaction between the adsorbate and the adsorbate. Under the condition of low

surface coverage,  $A_i$  ( $i=2,3,4,\dots$ ) could be ignored, so this equation could be simplified to:

$$\ln(n/p) = A_0 + A_1 n$$

There is a linear relationship between  $\ln(n/p)$  and the gas adsorbed amount  $n$  in the case of low surface coverage. The values of  $A_0$  and  $A_1$  could thus be obtained from the slop and the intercept.

The Henry's constants  $K_H(i)$  for CO<sub>2</sub> and N<sub>2</sub> could then be obtained by the following equation:

$$K_H(i) = e^{A_0}$$

Finally, the Henry's law CO<sub>2</sub>/N<sub>2</sub> selectivity was calculated via exploiting the following equation:

$$S_{ij} = K_H(i)/K_H(j)$$

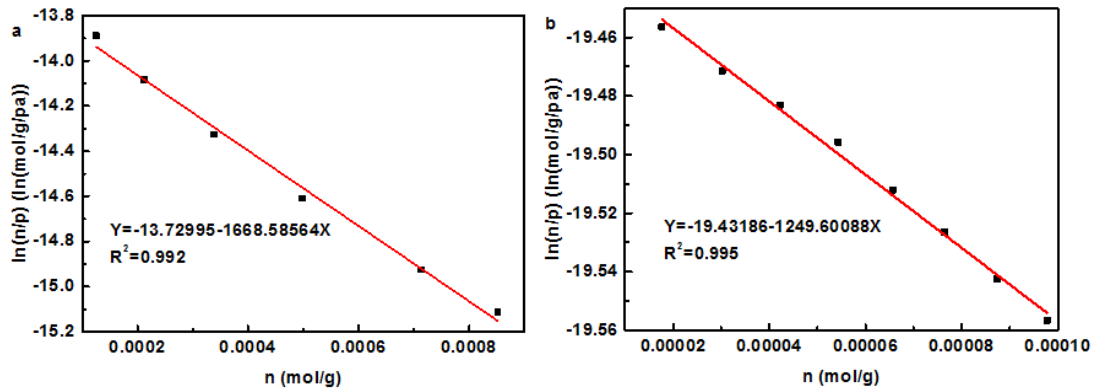

Figure S6. The virial characteristic curves of (a) CO<sub>2</sub> and (b) N<sub>2</sub> for PCF-500 at 0 °C.

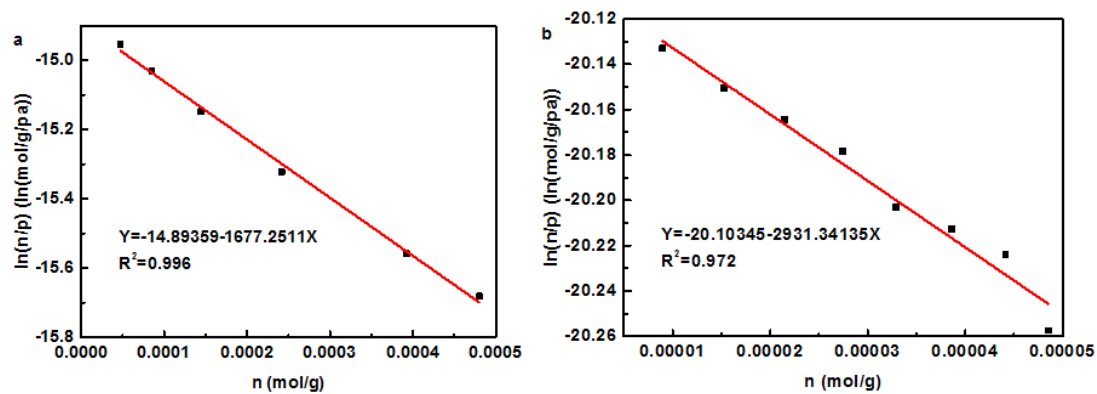

Figure S7. The virial characteristic curves of (a) CO<sub>2</sub> and (b) N<sub>2</sub> for PCF-500 at 25 °C.

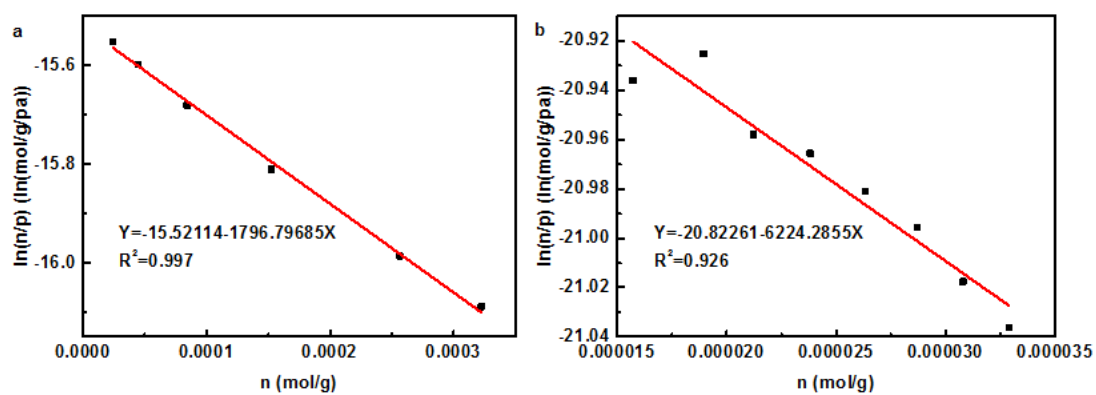

Figure S7. The virial characteristic curves of (a) CO<sub>2</sub> and (b) N<sub>2</sub> for PCF-500 at 40 °C.

Table S2. Henry's constants and virial fitting results for PCF-500 at 0, 25, and 40 °C.

| Gas, Temperature (°C)   | $K_H$                  | Fitting $R^2$ |
|-------------------------|------------------------|---------------|
| CO <sub>2</sub> , 0 °C  | $1.09 \times 10^{-6}$  | 0.992         |
| N <sub>2</sub> , 0 °C   | $3.64 \times 10^{-9}$  | 0.995         |
| CO <sub>2</sub> , 25 °C | $3.40 \times 10^{-7}$  | 0.996         |
| N <sub>2</sub> , 25 °C  | $1.86 \times 10^{-9}$  | 0.972         |
| CO <sub>2</sub> , 40 °C | $1.82 \times 10^{-7}$  | 0.997         |
| N <sub>2</sub> , 40 °C  | $9.05 \times 10^{-10}$ | 0.926         |
